# Supplementary material
Source: publisher figshare collection journal article supplement (https://tandf.figshare.com/ndownloader/files/22418673)

**SUPLLEMENTARY DATA**

**Secondary metabolites produced by *Colletotrichum lupini*, the causal agent of anthachnose of lupin (*Lupinus* spp.)**

Marco Masia, Paola Noceraa,Angela Boarib, Maria Chiara Zonnob, Gennaro Pescitellic, Sabrina Sarroccod, Riccardo Baroncellie,f, Giovanni Vannaccid, Maurizio Vurrob and Antonio Evidentea

aDipartimento di Scienze Chimiche, Università di Napoli “Federico II”, Complesso Universitario Monte S. Angelo, Via Cintia 4, 80126 Napoli, Italy

bIstituto di Scienze delle Produzioni Alimentari, CNR, Via Amendola 122/O, 70126 Bari, Italy

cDipartimento di Chimica e Chimica Industriale, Università di Pisa, Via Moruzzi 13, 56124 Pisa, Italy

dDipartimento di Scienze Agrarie, Alimentari e Agro-ambientali, Università di Pisa, Via del Borghetto, 80, 56124 Pisa, Italy

eInstituto Hispano-Luso de Investigaciones Agrarias (CIALE), University of Salamanca, Calle del Duero 12, 37185 Villamayor (Salamanca), Spain

Supporting Information List

Page 3: **Spectra 1.** 1H NMR spectrum of lupindolinone (**1**) (CDCl3, 500 MHz).

Page 4: **Spectra 2.** 13C NMR spectrum of lupindolinone (**1**) (CDCl3, 500 MHz).

Page 5: **Spectra 3.** HSQC spectrum of lupindolinone (**1**) (CDCl3, 500 MHz).

Page 6: **Spectra 4.** HMBC spectrum of lupindolinone (**1**) (CDCl3, 500 MHz).

Page 7: **Spectra 5.** COSY spectrum of lupindolinone (**1**) (CDCl3, 500 MHz).

Page 8: **Spectra 6.** HR ESI MS spectrum of lupindolinone (**1**).

Page 9: **Spectra 7.** IR spectrum of lupindolinone (**1**).

Page 10: **Spectra 8.** UV spectrum of lupindolinone (**1**).

Page 11: **Spectra 9.** 1H NMR spectrum of lupinlactone (**2**) (CDCl3, 500 MHz).

Page 12: **Spectra 10.** 13C NMR spectrum of lupinlactone (**2**) (CDCl3, 500 MHz).

Page 13: **Spectra 11.** HSQC spectrum of lupinlactone (**2**) (CDCl3, 500 MHz).

Page 14: **Spectra 12.** HMBC spectrum of lupinlactone (**2**) (CDCl3, 500 MHz).

Page 15: **Spectra 13.** COSY spectrum of lupinlactone (**2**) (CDCl3, 500 MHz).

Page 16: **Spectra 14.** HR ESI MS spectrum of lupinlactone (**2**).

Page 17: **Spectra 15.** IR spectrum of lupinlactone (**2**).

**Spectra 1.** 1H NMR spectrum of lupindolinone (**1**) (CDCl3, 500 MHz).


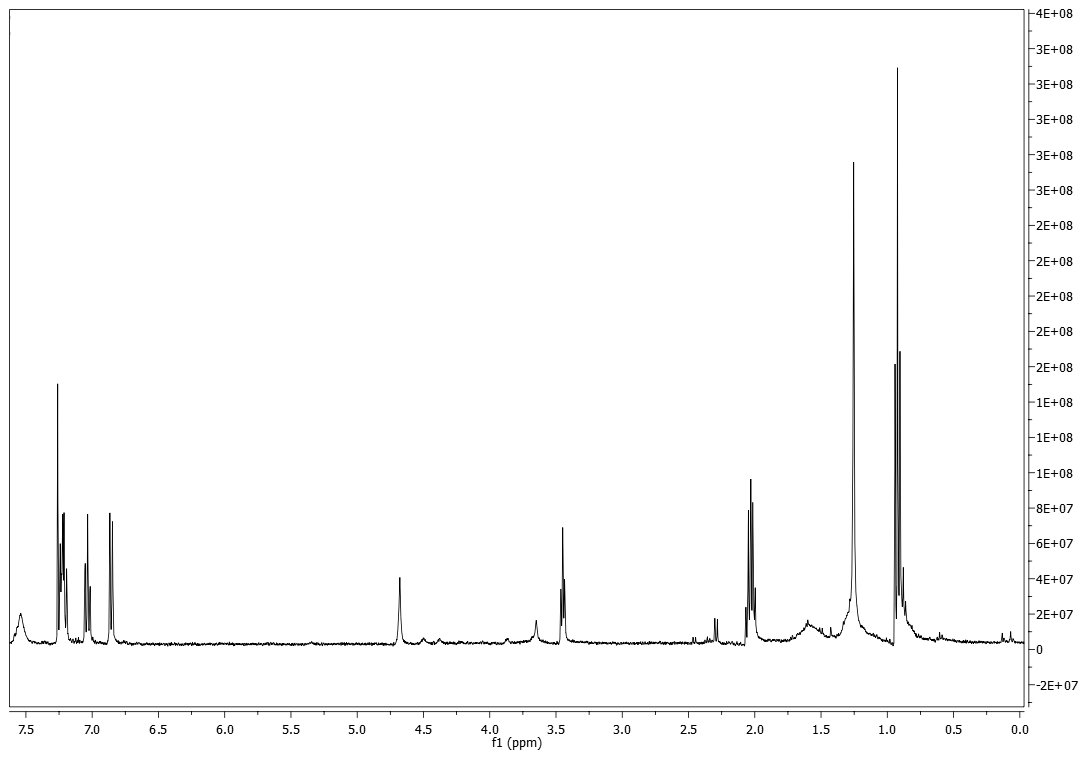


**Spectra 2.** 13C NMR spectrum of lupindolinone (**1**) (CDCl3, 500 MHz).


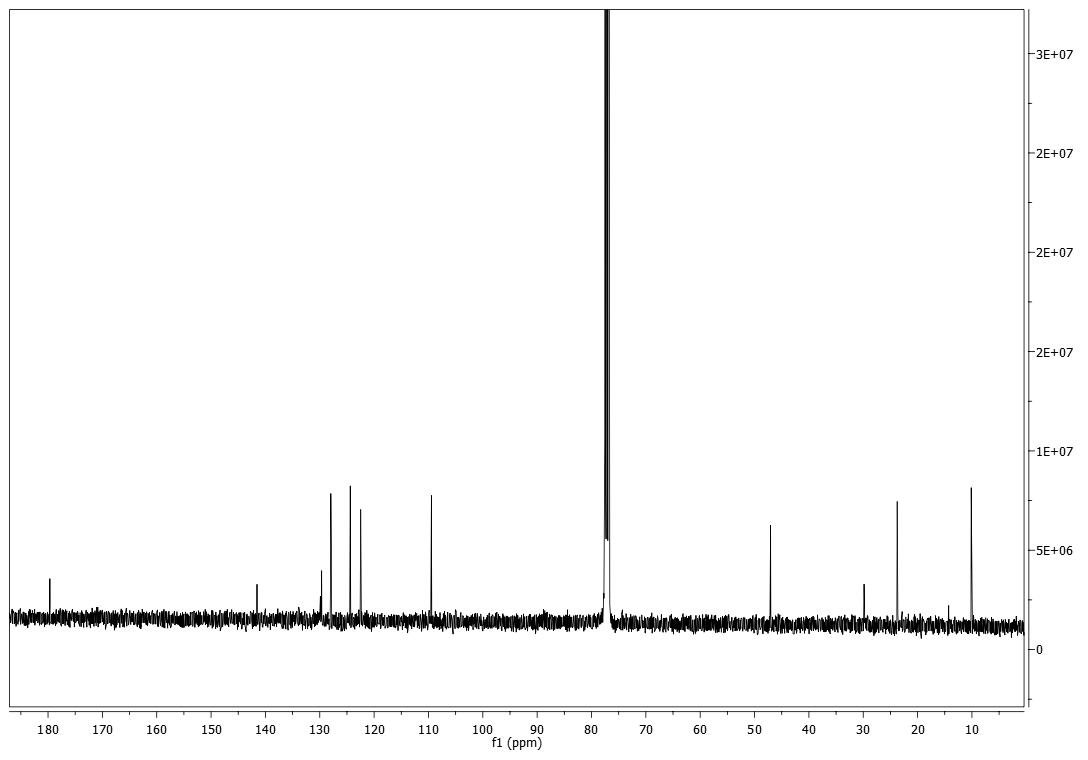


**Spectra 3.** HSQC spectrum of lupindolinone (**1**) (CDCl3, 500 MHz).


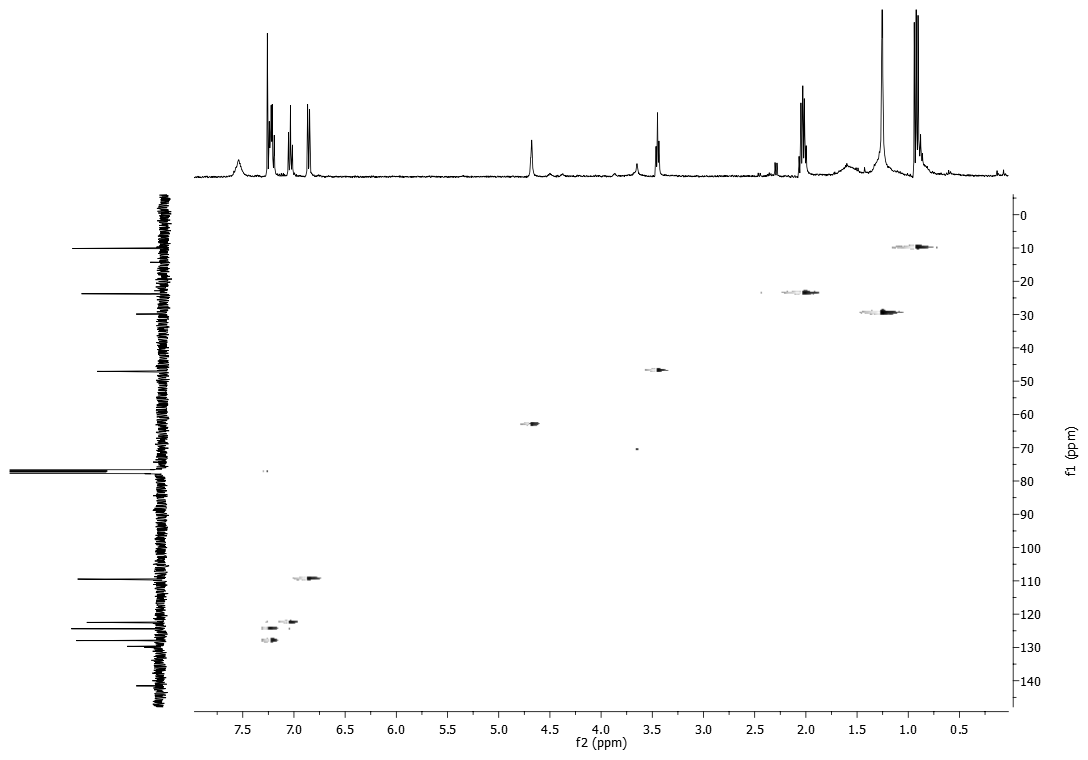


**Spectra 4.** HMBC spectrum of lupindolinone (**1**) (CDCl3, 500 MHz).


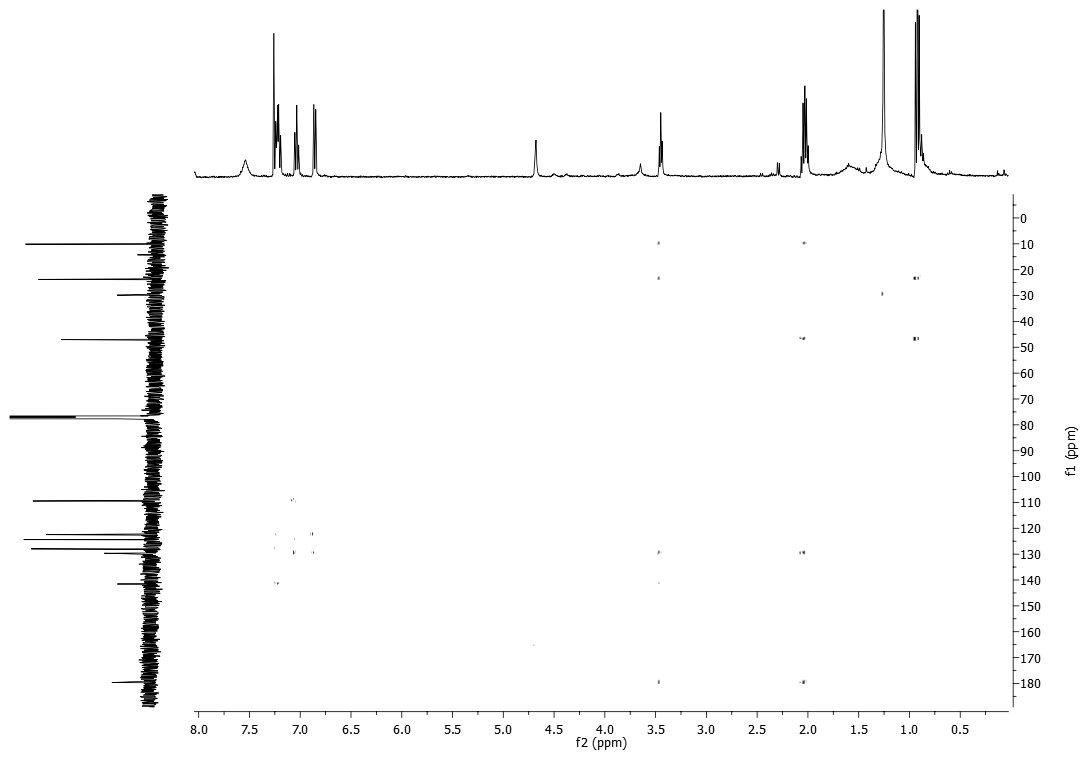


**Spectra 5.** COSY spectrum of lupindolinone (**1**) (CDCl3, 500 MHz).


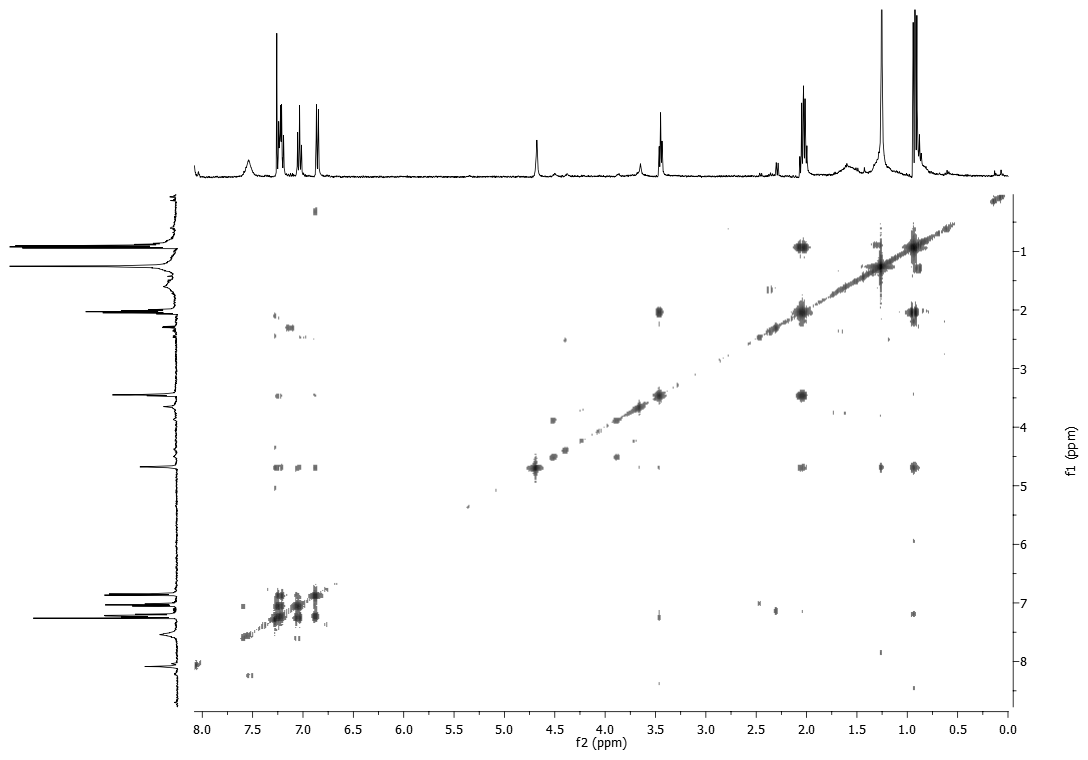


**Spectra 6.** HR ESI MS spectrum of lupindolinone (**1**).


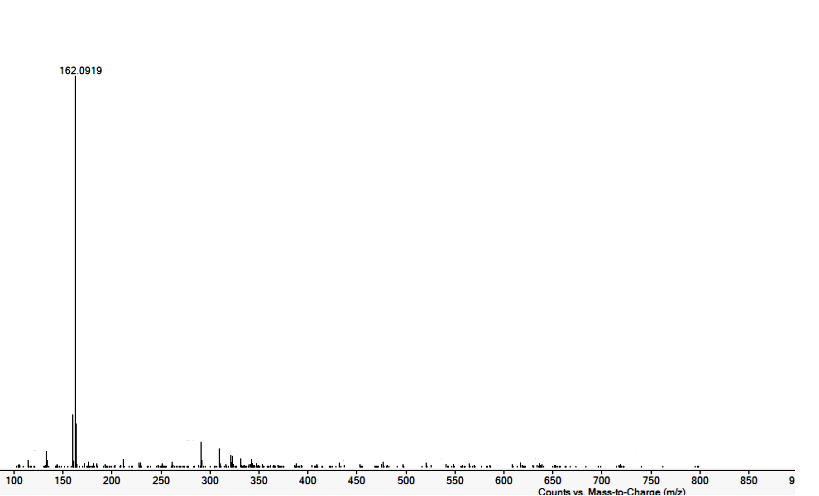


**Spectra 7.** IR spectrum of lupindolinone (**1**).


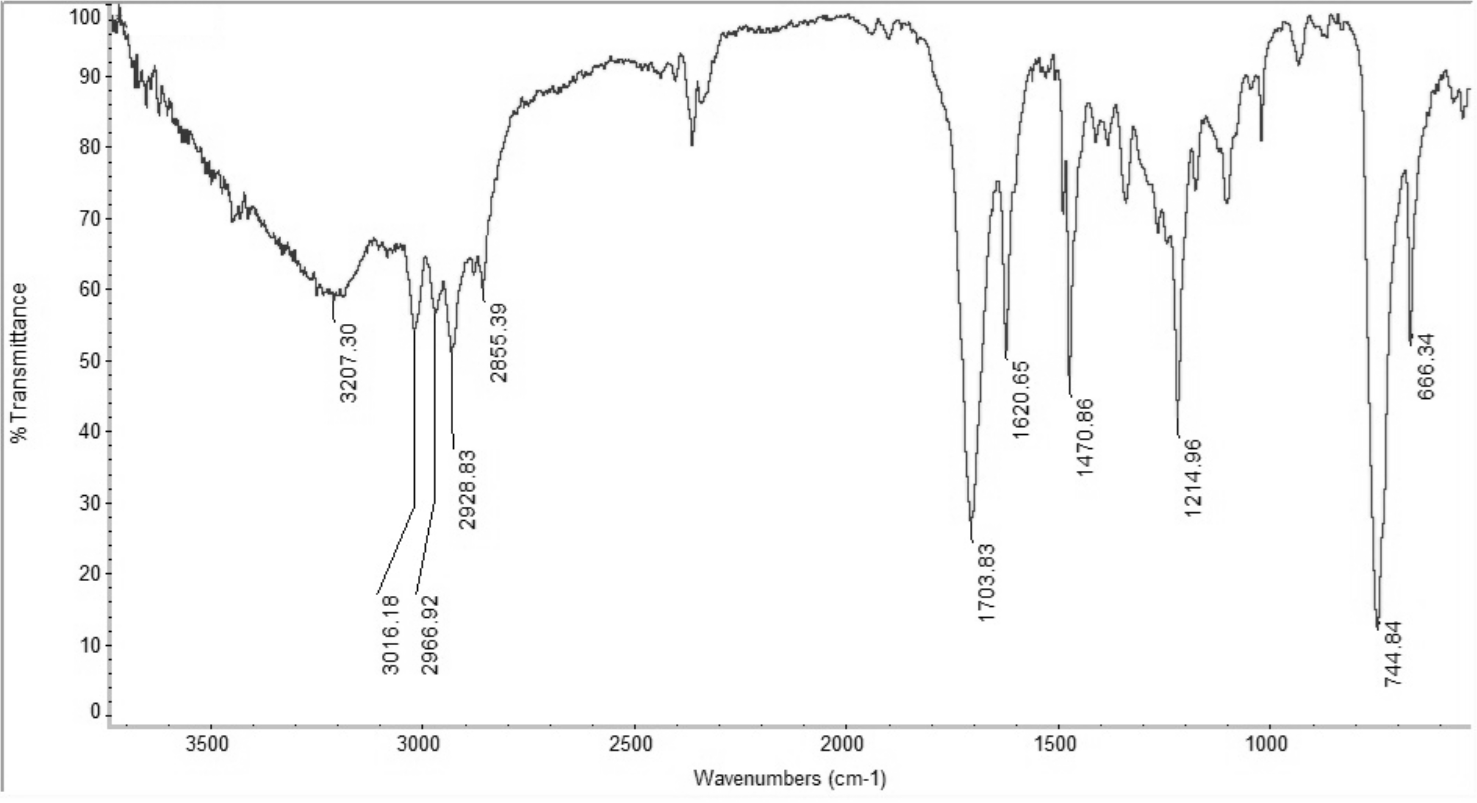


**Spectra 8.** UV spectrum of lupindolinone (**1**).


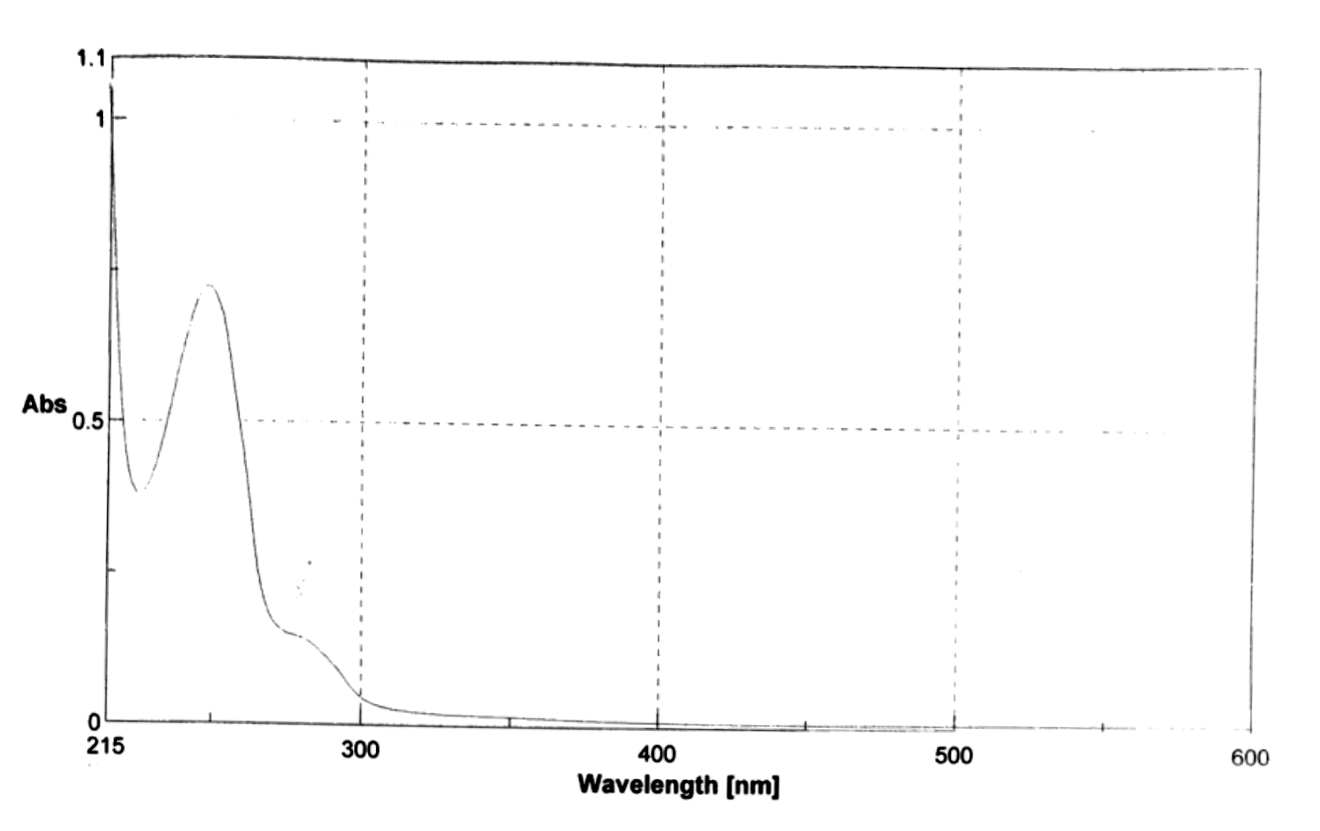


**Spectra 9.** 1H NMR spectrum of lupinlactone (**2**) (CDCl3, 500 MHz).


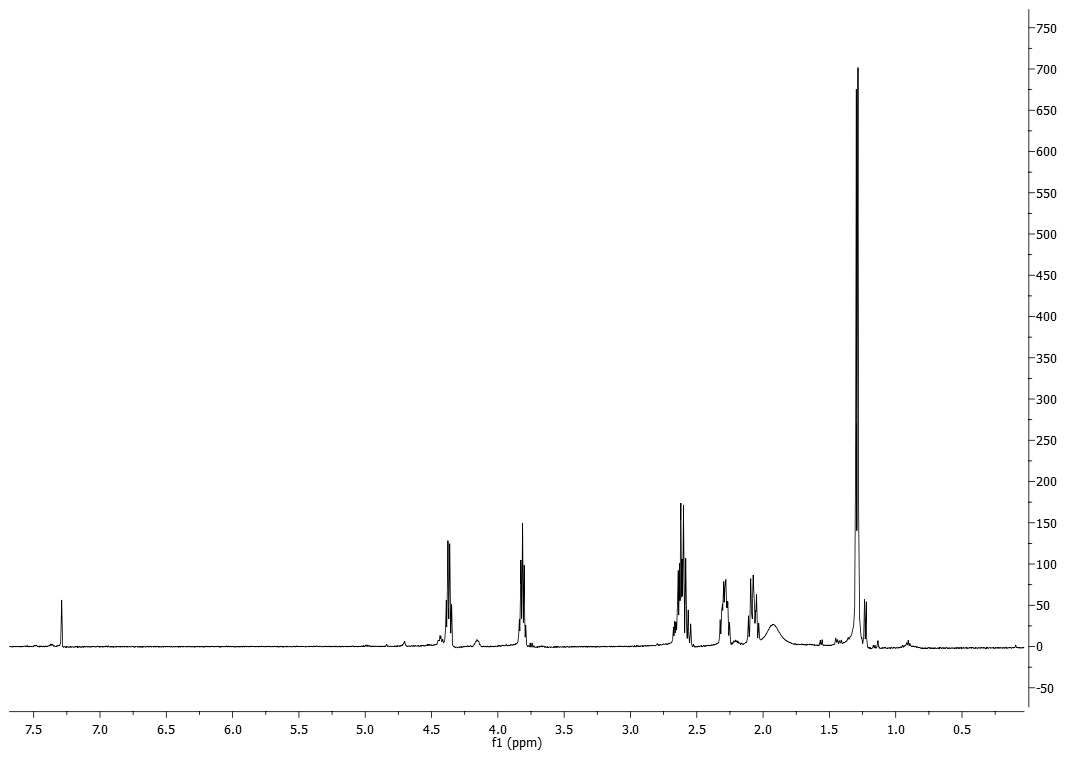


**Spectra 10.** 13C NMR spectrum of lupinlactone (**2**) (CDCl3, 500 MHz).


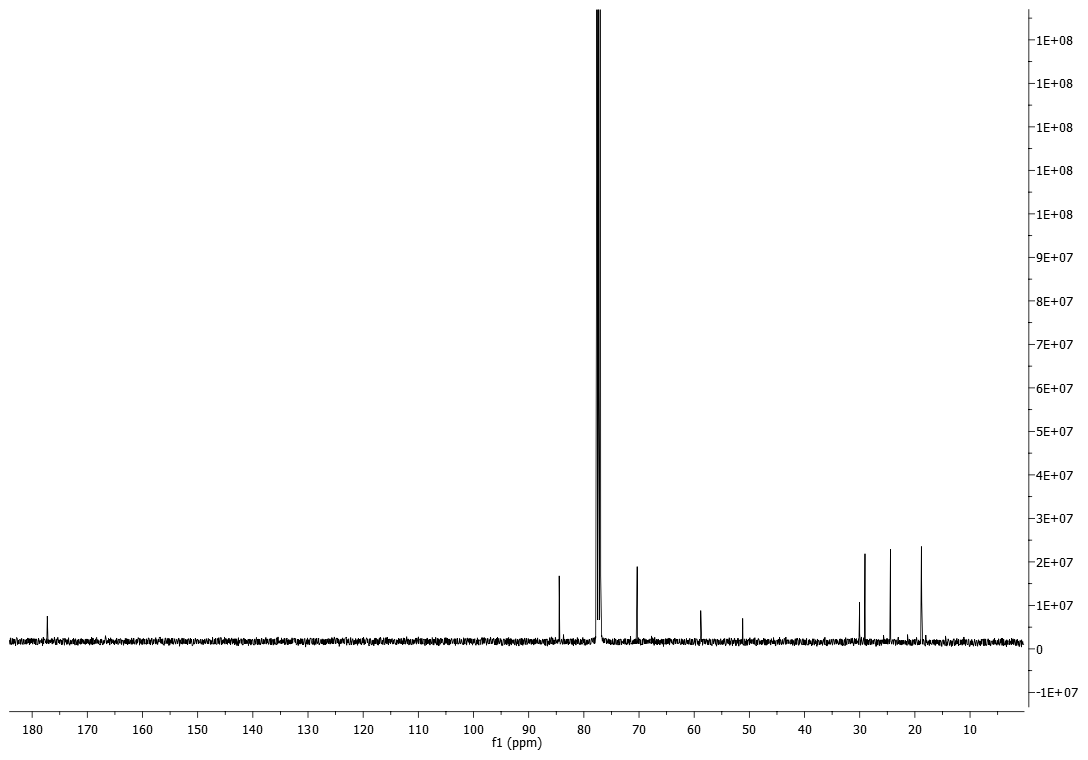


**Spectra 11.** HSQC spectrum of lupinlactone (**2**) (CDCl3, 500 MHz).


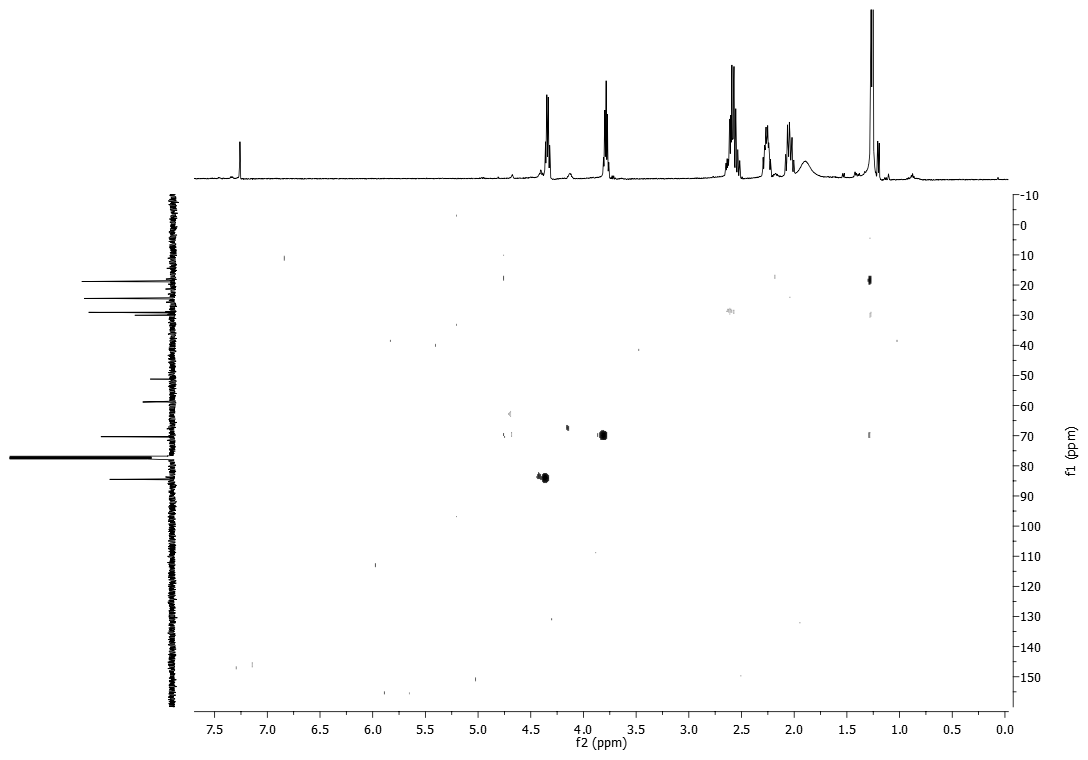


**Spectra 12.** HMBC spectrum of lupinlactone (**2**) (CDCl3, 500 MHz).


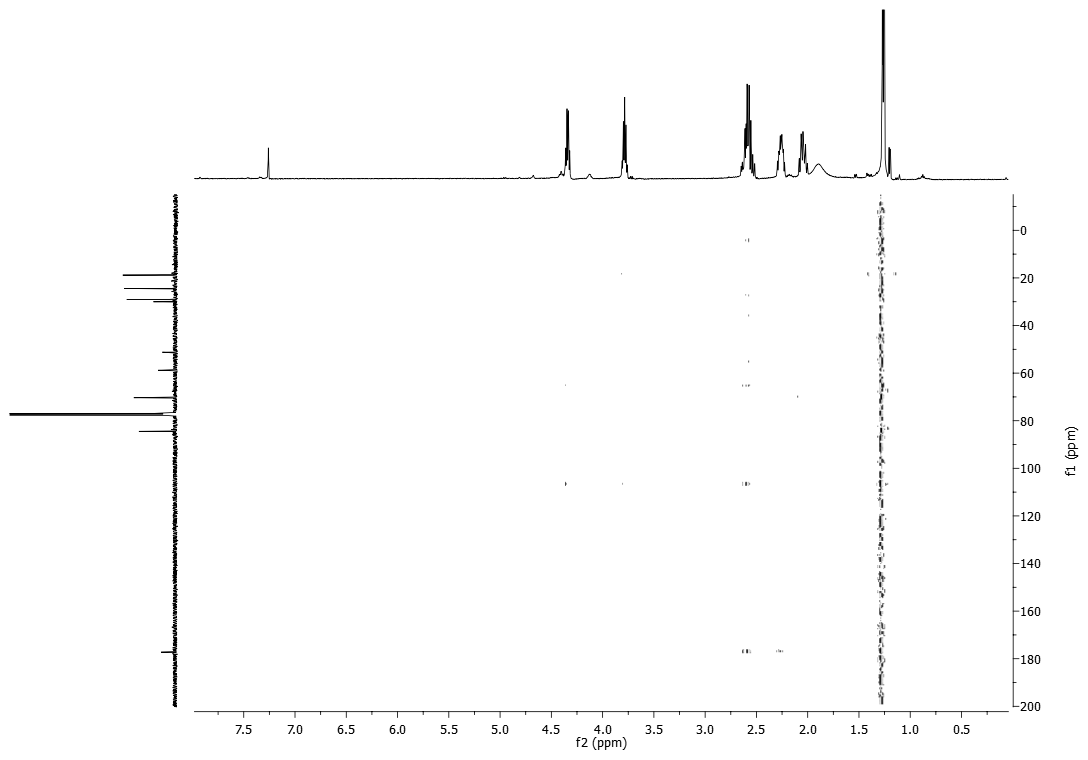


**Spectra 13.** COSY spectrum of lupinlactone (**2**) (CDCl3, 500 MHz).


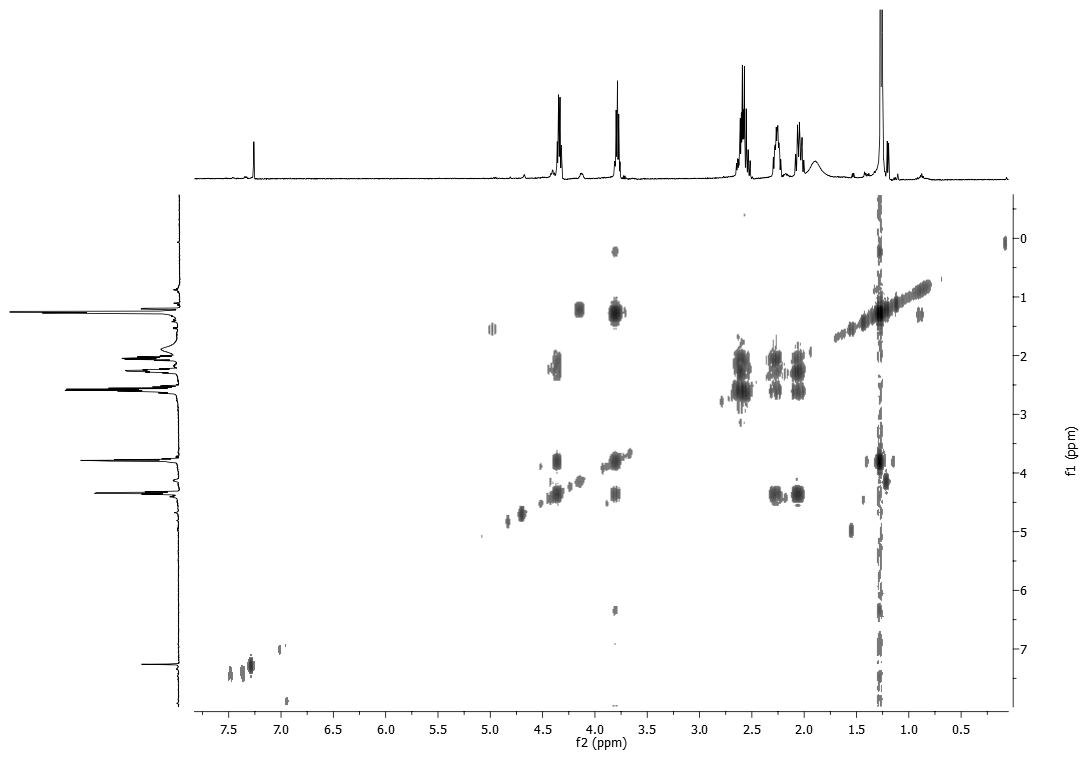


**Spectra 14.** HR ESI MS spectrum of lupinlactone (**2**).


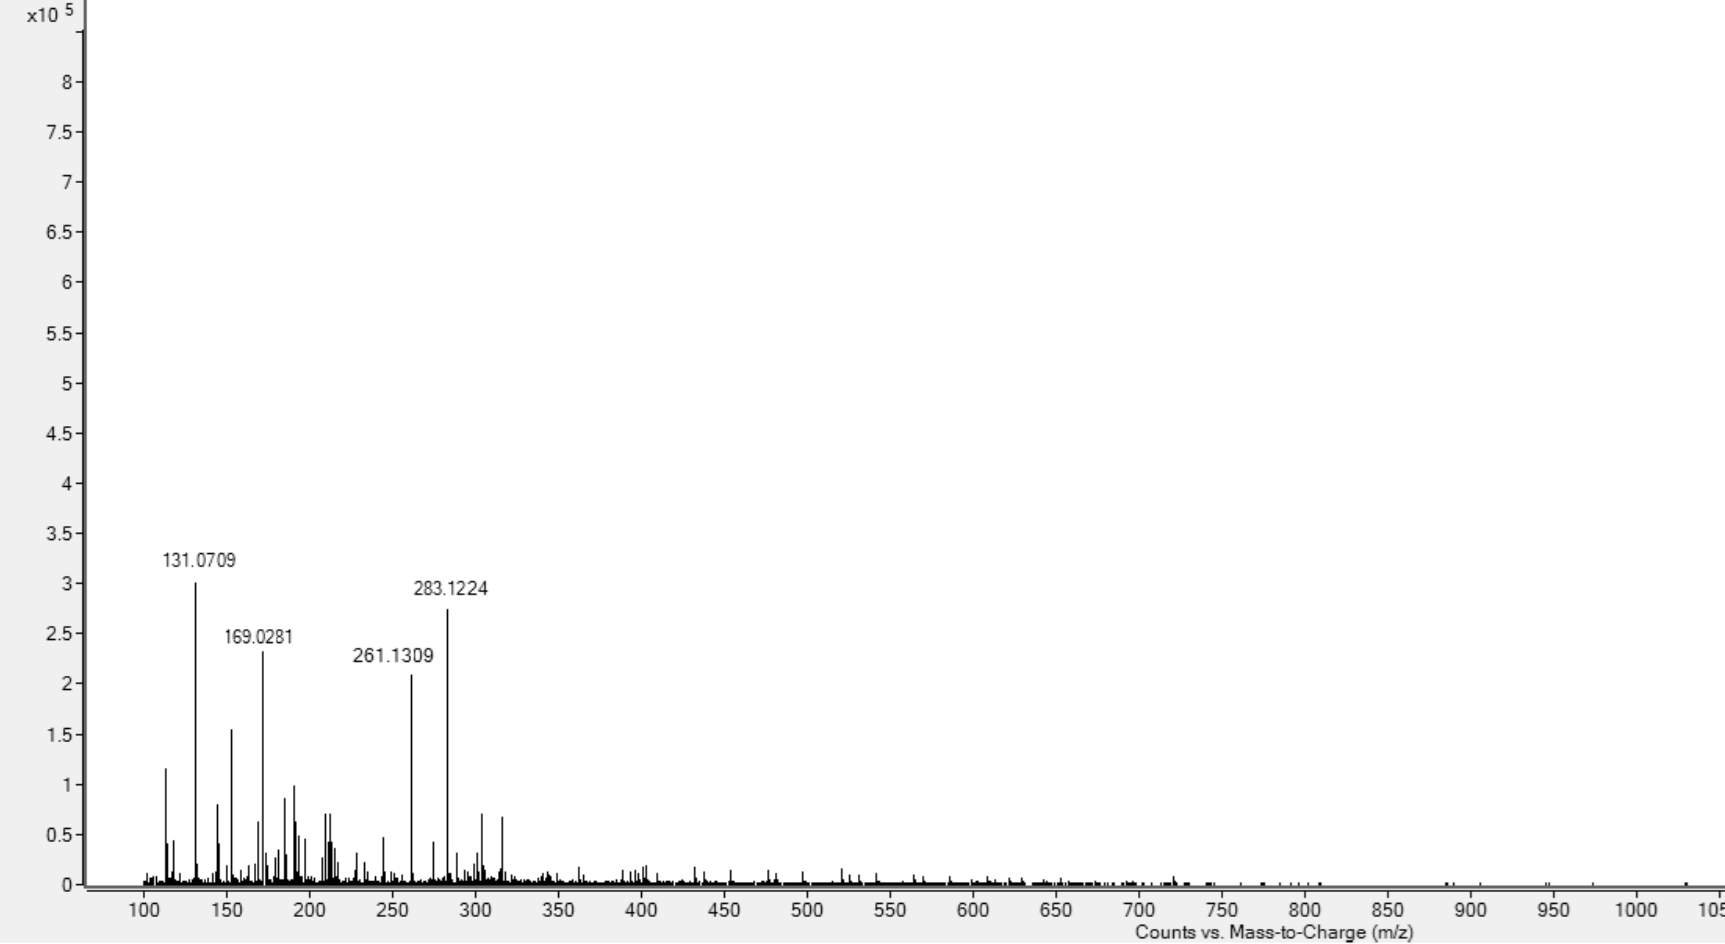


**Spectra 15.** IR spectrum of lupinlactone (**2**).


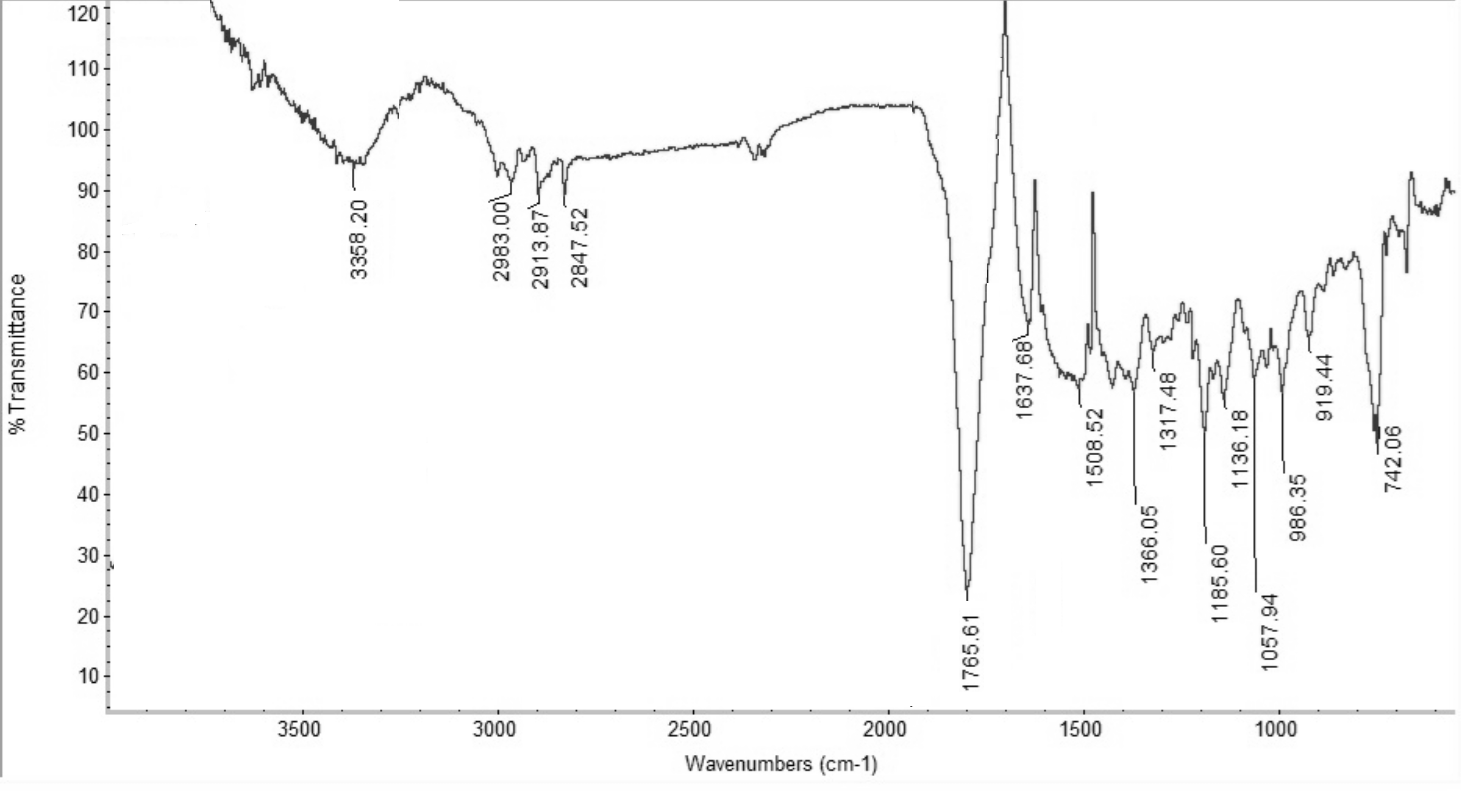

Supplement: Supplementary file 1 [file 22418673]
